# Supplementary material for: Curcumin increases breast cancer cell sensitivity to cisplatin by decreasing FEN1 expression
Source: PubMed Central journal article supplement (PMC5834274; doi:10.18632/oncotarget.24109), 2018-01-10
Supplement: oncotarget-09-11268-s001.pdf [file oncotarget-09-11268-s001.pdf]

## Curcumin increases breast cancer cell sensitivity to cisplatin by decreasing FEN1 expression

### SUPPLEMENTARY MATERIALS

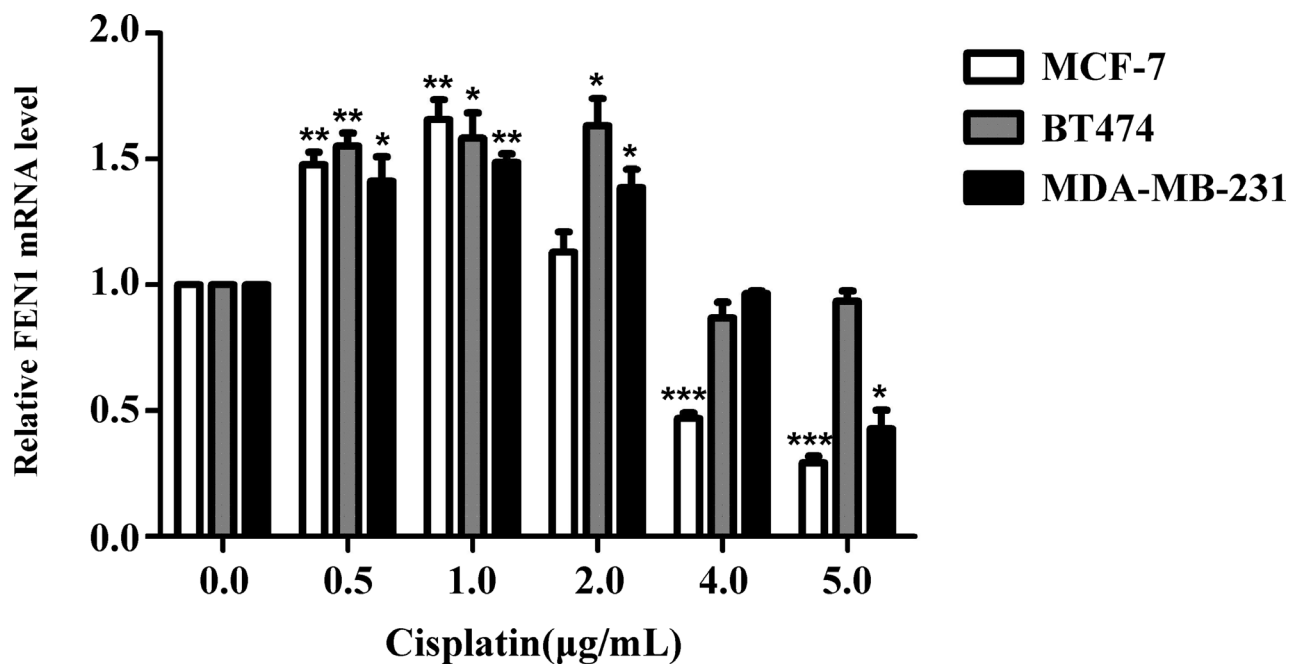

**Supplementary Figure 1: Cisplatin induced FEN1 mRNA up-regulation in breast cancer cells.** MCF-7, BT-474, and MDA-MB-231 cells were treated with increasing cisplatin concentrations for 24 h. FEN1 mRNA level was examined by qPCR, and the data was expressed as the fold change over the control. \* $P < 0.05$ , \*\* $P < 0.01$ , \*\*\* $P < 0.001$ .

**A**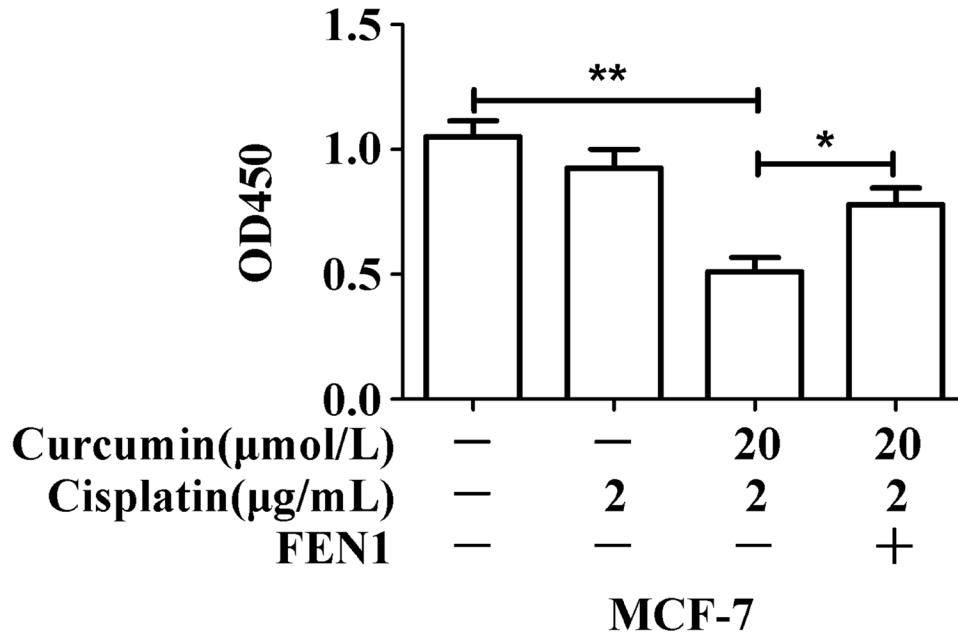**B**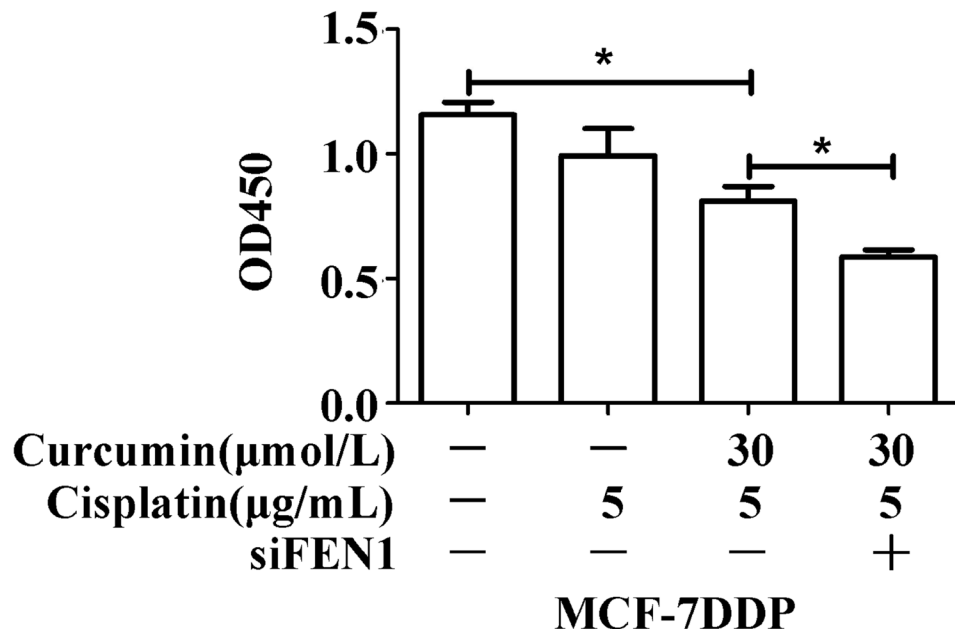

**Supplementary Figure 2: The chemosensitizing effect of curcumin to cisplatin in breast cancer cells is mediated through down-regulation of FEN1 expression.** (A) MCF-7 cells stably overexpressing FEN1 and control cells were treated with or without 2 μg/mL cisplatin combined with 20 μmol/L curcumin for 48 h. Cell proliferation was analyzed by CCK-8 assay. \* $P < 0.05$ . (B) MCF-7DDP cells were transfected with FEN1 siRNA, and its negative control siRNA were treated with or without 5 μg/mL cisplatin combined with 20 μmol/L curcumin for 48 h. Cell proliferation was analyzed by CCK-8 assay. \* $P < 0.05$ .

|                                                |   |          |           |           |
|------------------------------------------------|---|----------|-----------|-----------|
| <b>U0126 (<math>\mu\text{mol/L}</math>)</b>    | — | —        | <b>10</b> | <b>10</b> |
| <b>Cisplatin (<math>\mu\text{g/mL}</math>)</b> | — | <b>5</b> | —         | <b>5</b>  |

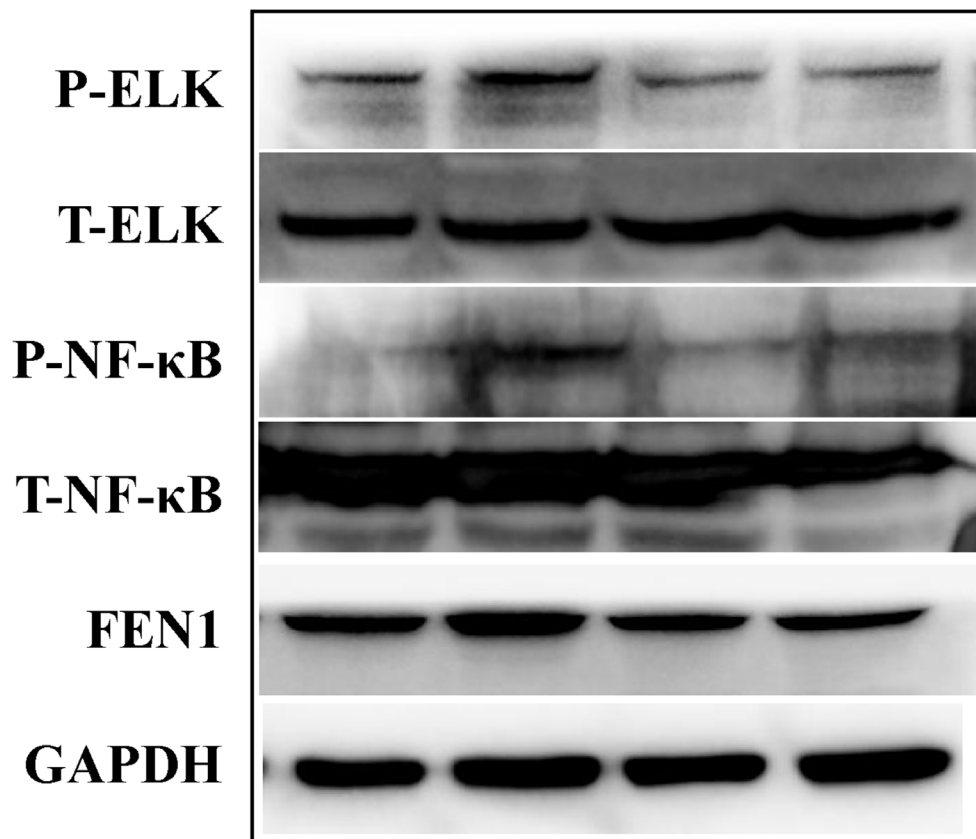

## MCF-7/DDP

**Supplementary Figure 3: The correlation between the phosphorylation changes of NF- $\kappa$ B or ELK and the changes of FEN expression in MCF-7/DDP cells.** MCF-7/DDP cells treated with or without 5  $\mu\text{g/mL}$  cisplatin combined with or without 10  $\mu\text{M/mL}$  U0126 for 30 min. ELK, NF- $\kappa$ B, and ERK1/2 phosphorylation and FEN1 protein were detected by western blotting as described in Figure 7B.
